# Supplementary material for: Dysregulation of junctional adhesion molecule-A via p63/GATA-3 in head and neck squamous cell carcinoma
Source: PubMed Central journal article supplement (PMC5085126; doi:10.18632/oncotarget.8432), 2016-03-28
Supplement: oncotarget-07-33887-s001.pdf [file oncotarget-07-33887-s001.pdf]

## Dysregulation of junctional adhesion molecule-A via p63/GATA-3 in head and neck squamous cell carcinoma

### Supplementary Materials

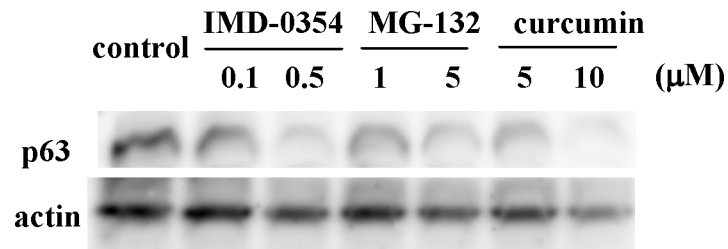

Supplementary Figure S1: Western blotting for p63 in Detroit562 cells treated with the NF- $\kappa$ B inhibitors IMD-0354, MG-132 and curcumin.
